# Supplementary material
Source: Research Square preprint supplement (doi:10.21203/rs.3.rs-8855590/v1)
Supplement: Supplementary file 1 [file 7668925b85a9de0c32d8f8c4.docx]

**Supplementary Information**

**Title:** *Quantitative Digital Tapho-geochemistry of Permian Petrified Wood: Multi-phase Permineralisation Resolved via High-Resolution μCT and Molecular Spectroscopy*

Authors: Baez, E., et al. Journal: *Paläontologische Zeitschrift* (PalZ)

1. Data Availability and Repository Link

In accordance with Open Science practices, the full raw and processed datasets associated with this study have been deposited in the Zenodo repository. While the summary tables are provided below for immediate review, the high-resolution volumetric data and spectral files must be accessed via the following DOI:

Repository DOI: <https://doi.org/10.5281/zenodo.18597970>

The repository contains:

Original μCT Slices: 1,428 high-resolution TIFF images (10 *μ*m voxel size).

Priority ROI Dataset: 114 selected slices for detailed taphonomic analysis.

3D Visualisation: Animated fly-through (GIF) of the mineralised tracheid system.

Raw Spectral Data: Original Raman shift data for Spot 04.

2. Supplementary Tables

**Table S1.** Raman vibrational mode assignments for *Baieroxylon cicatricum* (Specimen CTES-PB 12337)

| Mineral Phase | Associated Band | Raman Shift (cm−1) | Vibrational Mode / Assignment | Taphonomic Significance |
| --- | --- | --- | --- | --- |
| α-Quartz & Chalcedony | ν₁, ν₆ | 128, 464 | Lattice modes and symmetric Si-O-Si stretching | Dominant microcrystalline matrix; result of diagenetic recrystallisation. |
|  | ν₂, ν₃, ν₄ | 206, 265, 356 | Triple-degenerate stretching modes | High-fidelity anatomical preservation within the tracheid framework. |
|  | ν₅, ν₇, ν₈ | 402, 698, 1066 | O−Si−O bending and asymmetric stretching | Matrix stability and secondary permineralisation integrity. |
| Moganite | νₘₒg | 503 | Monoclinic SiO₂ phase diagnostic peak | Key indicator of metastable silica polymorphs within the vascular tissue. |
| Opal (Amorphous SiO₂) | ν₉, ν₁₀, ν₁₁ | 787, 978, 1198 | Internal tetrahedral vibrations | Amorphous phases situated at the lumen-cell wall interface. |
|  | νₘₐₓ | 1587 | Primary Opal-CT / Opal-A intensity band | Final metasomatic pulses during late-stage silicification. |
| Hematite (Fe₂O₃) | νₕₑₘ | 1313 | Eg and A₁g vibrational modes | Iron oxide dissemination within the cellular interstices. |
| Uvarovite (Cr-Garnet) | νₕᵤᵛ | 590, 894 | Silicate tetrahedra (SiO₄) vibrations | Presence of Chromium-rich phases (correlating with 7.56wt% Cr EDS data). |
| Calcite (CaCO₃) | νₕ𝑎𝑟𝑡𝑖𝑛𝑒𝑠𝑡𝑖𝑛𝑒 | 1435 | Carbonate group symmetric stretching | Minor secondary carbonatisation within the petrified matrix. |
| Carbonaceous Matter | D/G bands | >1700 | Disordered graphitic lattice vibrations | Palaeozoic phytogenic remnants |

Note: This table correlates the observed Raman shifts with diagnostic silica polymorphs (Quartz and Moganite) and secondary mineral phases.

**Table S2.** SEM–EDS elemental quantification (Specimen CTES-PB 12337)

| Analytical Point | Microstructural Feature | Major Elements (wt%) | Minor/Trace Elements | Interpretation |
| --- | --- | --- | --- | --- |
| Matrix / Interstitial | Microcrystalline silica matrix (Moganite phase) | Si, O, Fe | Cr, U, Sn, Ca | High-density metasomatic domains; enrichment in transition elements. |
| Tracheid Lumen | Subeuhedral alpha-quartz crystals (∼10 μm) | Si, O | Traces of Al, Fe | Automorphic quartz infill; characteristic of rapid silicification phases. |
| Radii / Cell Walls | Chalcedonic quartz aggregates | Si, O | Fe, C (relict) | Primary silicification; presence of vestigial phytogenic carbon. |
| High-Z Inclusions | Bright BSE micro-particles | Fe, Cr, U | Sn | Evidence of hydrothermal fluid circulation associated with local fault zones. |

Note: Quantitative data representing the average elemental weight percentage (wt%) from multiple regions of interest, highlighting the anomalous Chromium (Cr) and Iron (Fe) concentrations.

3. Repository Structure (README Summary)

The Zenodo repository is organised to ensure full reproducibility. Users should refer to the README.txt file within the repository for detailed metadata, hardware specifications (SkyScan 1273), and coordinate systems used for the 3D reconstructions.
